# Supplementary material for: GABAA and GABAB Receptors Mediate GABA-Induced Intracellular Ca2+ Signals in Human Brain Microvascular Endothelial Cells
Source: MDPI journal article supplement (doi:10.3390/cells11233860), 2022-11-30
Supplement: s1 [file s1]

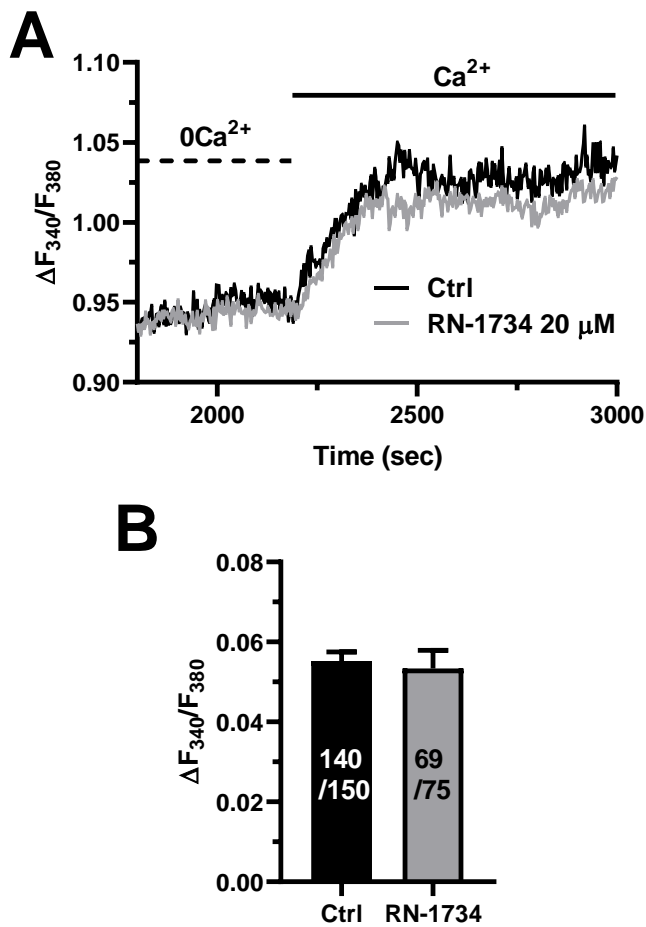

**Supplementary Figure S1. TRPV4 inhibition does not affect GABA-evoked extracellular Ca<sup>2+</sup> entry in hCMEC/D3 cells.** A, GABA-induced Ca<sup>2+</sup> influx was not inhibited by blocking TRPV4 channels with RN-1734 (20  $\mu$ M, 20 min). Intracellular Ca<sup>2+</sup> release is not shown. B, Mean  $\pm$  SE of the amplitude of GABA-evoked extracellular Ca<sup>2+</sup> entry in the absence (Ctrl) and presence of RN-1734.

**Supplementary Table S1. Primers used for real-time**

| primer name    | sequence 5'-3'           | target                | amplicon (bp) | Tm    | NCBI Reference Sequence | Sequence Name                                                                                            |
|----------------|--------------------------|-----------------------|---------------|-------|-------------------------|----------------------------------------------------------------------------------------------------------|
| gabaA-a1_alt_F | TGGAAAGAAGTCAGTGGCCCA    | GABA <sub>A</sub> -α1 | 102           | 61.6  | NM_000806.5             | Homo sapiens gamma-aminobutyric acid type A receptor subunit alpha1 (GABRA1), transcript variant 1, mRNA |
| gabaA-a1_alt_R | GCTCTCACTGTCAGCCTCATGG   |                       |               | 62.93 |                         |                                                                                                          |
| gabaA-a2_F     | CTGCTTGCCGTTTCAGAGCG     | GABA <sub>A</sub> -α2 | 115           | 62.5  | NM_000807.4             | Homo sapiens gamma-aminobutyric acid type A receptor subunit alpha2 (GABRA2), transcript variant 1, mRNA |
| gabaA-a2_R     | ATGTTAGCCAGCACCAACCT     |                       |               | 59.59 |                         |                                                                                                          |
| gabaA-a3_F     | GCCCGTACAGTCTTTGGTGT     | GABA <sub>A</sub> -α3 | 118           | 60.25 | NM_000808.4             | Homo sapiens gamma-aminobutyric acid type A receptor subunit alpha3 (GABRA3), mRNA                       |
| gabaA-a3_R     | AGACGGCTATGAACCAATCC     |                       |               | 59.18 |                         |                                                                                                          |
| gabaA-a6_F     | GACGACCCTAGGAGGGTGAA     | GABA <sub>A</sub> -α6 | 97            | 60.32 | NM_000811.3             | Homo sapiens gamma-aminobutyric acid type A receptor subunit alpha6 (GABRA6), mRNA                       |
| gabaA-a6_R     | AGGGCATTCTTAGCCACAGA     |                       |               | 59.36 |                         |                                                                                                          |
| gabaA-b1_F     | TGTGGACAGTACAAAATCGAGAGA | GABA <sub>A</sub> -β1 | 93            | 59.72 | NM_000812.4             | Homo sapiens gamma-aminobutyric acid type A receptor subunit beta1 (GABRB1), mRNA                        |
| gabaA-b1_R     | TGGGTTCATTGGTGCTGTGT     |                       |               | 60.11 |                         |                                                                                                          |
| gabaA-b2_F     | TTTACTGGCGTGGCGATGAT     | GABA <sub>A</sub> -β2 | 125           | 60.11 | NM_021911.3             | Homo sapiens gamma-aminobutyric acid type A receptor subunit beta2 (GABRB2), transcript variant 1, mRNA  |
| gabaA-b2_R     | CCTGGGATAGGAACCTGTGG     |                       |               | 59.16 |                         |                                                                                                          |
| gabaA-b3_F     | CTGCGCCAGAGTGTGAAC       | GABA <sub>A</sub> -β3 | 96            | 61.32 | NM_000814.6             | Homo sapiens gamma-aminobutyric acid type A receptor subunit beta3 (GABRB3), transcript variant 1, mRNA  |
| gabaA-b3_R     | TCGGGTCTTAGCGAATGTC      |                       |               | 59.54 |                         |                                                                                                          |
| gabaA-g1_alt_F | TGCAGAACAGGATCTTGGAGGGA  | GABA <sub>A</sub> -γ1 | 97            | 63.26 | NM_173536.4             | Homo sapiens gamma-aminobutyric acid type A receptor subunit gamma1 (GABRG1), mRNA                       |
| gabaA-g1_alt_R | ACAGGGCAAAAGCGGTTGGG     |                       |               | 63.89 |                         |                                                                                                          |
| gabaA-g2_F     | AGCTCAGTCTACTCGACTCCT    | GABA <sub>A</sub> -γ2 | 90            | 52.38 | NM_198904.4             | Homo sapiens gamma-aminobutyric acid type A receptor subunit gamma2 (GABRG2), transcript variant 1, mRNA |
| gabaA-g2_R     | CTGGCTAGTGAAGCCAGGGT     |                       |               | 60    |                         |                                                                                                          |
| gabaA-g3_F     | TTCCCTGTATACTGACTGTGGT   | GABA <sub>A</sub> -γ3 | 94            | 58.21 | NM_033223.5             | Homo sapiens gamma-aminobutyric acid type A receptor subunit gamma3 (GABRG3), transcript variant 1, mRNA |
| gabaA-g3_R     | ACCGTGGTGATGCCTAATGC     |                       |               | 60.75 |                         |                                                                                                          |
| gabaB1_F       | GCGGCTGTGTCCGAATCTGCT    | GABA <sub>B</sub> -1  | 131           | 65.59 | NM_001470.4             | Homo sapiens gamma-aminobutyric acid type B receptor subunit 1 (GABBR1), transcript variant 1, mRNA      |
| gabaB1_alt_R   | CAGATGGAAGTCGGGGTCACAC   |                       |               | 62.87 |                         |                                                                                                          |
| gabaB2_F       | TGGAGGCGTCTGTCCATCCGT    | GABA <sub>B</sub> -2  | 93            | 65.62 | NM_005458.8             | Homo sapiens gamma-aminobutyric acid type B receptor subunit 2 (GABBR2), mRNA                            |
| gabaB2_alt_R   | ACAGGCGTGGTTGCAGCAAAA    |                       |               | 65.99 |                         |                                                                                                          |
